# Supplementary material for: Prognostic utility of submental B/M-Mode ultrasonography for swallowing function assessment in post-stroke pharyngeal dysphagia: a preliminary study
Source: PeerJ. 2025 Sep 22;13:e20046. doi: 10.7717/peerj.20046 (PMC12462686; doi:10.7717/peerj.20046)
Supplement: Supplemental Information 1 [file peerj-13-20046-s001.xls]

## Sheet: 沈学祥
#Kinovea Trajectory data export
#T X Y
0:00:00:00 0.00 0.00
0:00:00:03 0.00 0.00
0:00:00:07 0.00 0.00
0:00:00:11 0.00 0.00
0:00:00:15 0.00 0.00
0:00:00:19 0.00 0.00
0:00:00:23 0.00 0.00
0:00:00:27 0.03 0.00
0:00:00:31 0.03 0.00
0:00:00:35 0.00 0.00
0:00:00:39 0.00 0.00
0:00:00:43 0.00 0.00
0:00:00:47 0.00 0.00
0:00:00:51 0.00 0.00
0:00:00:55 0.00 0.00
0:00:00:59 0.00 0.00
0:00:00:63 0.00 0.00
0:00:00:67 0.00 0.00
0:00:00:71 0.00 0.00
0:00:00:75 0.03 0.03
0:00:00:79 0.03 0.03
0:00:00:83 0.03 0.03
0:00:00:87 0.03 0.03
0:00:00:90 0.03 0.03
0:00:00:94 0.03 0.03
0:00:00:98 0.00 0.03
0:00:01:02 0.00 0.03
0:00:01:06 0.00 0.03
0:00:01:10 0.00 0.03
0:00:01:14 0.00 0.03
0:00:01:18 -0.03 0.00
0:00:01:22 -0.03 -0.03
0:00:01:26 -0.06 -0.06
0:00:01:30 -0.03 -0.06
0:00:01:34 -0.06 -0.09
0:00:01:38 -0.13 -0.19
0:00:01:42 -0.19 -0.28
0:00:01:46 -0.19 -0.31
0:00:01:50 -0.25 -0.41
0:00:01:54 -0.28 -0.47
0:00:01:58 -0.31 -0.50
0:00:01:62 -0.31 -0.53
0:00:01:66 -0.38 -0.56
0:00:01:70 -0.50 -0.66
0:00:01:74 -0.69 -0.75
0:00:01:78 -0.81 -0.78
0:00:01:81 -0.88 -0.78
0:00:01:85 -1.03 -0.84
0:00:01:89 -1.16 -0.88
0:00:01:93 -1.25 -0.88
0:00:01:97 -1.31 -0.84
0:00:02:01 -1.34 -0.81
0:00:02:05 -1.38 -0.78
0:00:02:09 -1.38 -0.69
0:00:02:13 -1.38 -0.63
0:00:02:17 -1.38 -0.59
0:00:02:21 -1.34 -0.53
0:00:02:25 -1.31 -0.50
0:00:02:29 -1.28 -0.47
0:00:02:33 -1.22 -0.44
0:00:02:37 -1.16 -0.44
0:00:02:41 -1.13 -0.44
0:00:02:45 -0.97 -0.38
0:00:02:49 -0.91 -0.34
0:00:02:53 -0.91 -0.34
0:00:02:57 -0.91 -0.34
0:00:02:61 -0.88 -0.34
0:00:02:65 -0.88 -0.34
0:00:02:68 -0.88 -0.34
0:00:02:72 -0.78 -0.31
0:00:02:76 -0.75 -0.31
0:00:02:80 -0.75 -0.31
0:00:02:84 -0.72 -0.31
0:00:02:88 -0.69 -0.31
0:00:02:92 -0.69 -0.31
0:00:02:96 -0.66 -0.28
0:00:03:00 -0.66 -0.28
0:00:03:04 -0.63 -0.28
0:00:03:08 -0.63 -0.28
0:00:03:12 -0.59 -0.28
0:00:03:16 -0.59 -0.28
0:00:03:20 -0.56 -0.28
0:00:03:24 -0.53 -0.25
0:00:03:28 -0.53 -0.25
0:00:03:32 -0.50 -0.25
0:00:03:36 -0.50 -0.25
0:00:03:40 -0.47 -0.25
0:00:03:44 -0.44 -0.22
0:00:03:48 -0.41 -0.22
0:00:03:52 -0.41 -0.22
0:00:03:56 -0.41 -0.22
0:00:03:59 -0.38 -0.19
0:00:03:63 -0.38 -0.19
0:00:03:67 -0.38 -0.19
0:00:03:71 -0.34 -0.19
0:00:03:75 -0.34 -0.19
0:00:03:79 -0.34 -0.19
0:00:03:83 -0.38 -0.19
0:00:03:87 -0.38 -0.19
0:00:03:91 -0.41 -0.22
0:00:03:95 -0.41 -0.22
0:00:03:99 -0.38 -0.19
0:00:04:03 -0.44 -0.22
0:00:04:07 -0.41 -0.22
0:00:04:11 -0.41 -0.22
0:00:04:15 -0.41 -0.19
0:00:04:19 -0.41 -0.19
0:00:04:23 -0.28 -0.09
0:00:04:27 -0.25 -0.09
0:00:04:31 -0.25 -0.09
0:00:04:35 -0.19 -0.06
0:00:04:39 -0.19 -0.06
0:00:04:43 -0.16 -0.03
0:00:04:46 -0.16 -0.03
0:00:04:50 -0.16 -0.03
0:00:04:54 -0.16 -0.03
0:00:04:58 -0.09 0.00
0:00:04:62 -0.09 0.00
0:00:04:66 -0.13 -0.03
0:00:04:70 -0.09 0.00
0:00:04:74 -0.09 0.00
0:00:04:78 -0.09 0.00
0:00:04:82 -0.06 0.00
0:00:04:86 -0.09 0.00
0:00:04:90 -0.09 0.00
