# Supplementary material for: Prognostic utility of submental B/M-Mode ultrasonography for swallowing function assessment in post-stroke pharyngeal dysphagia: a preliminary study
Source: PeerJ. 2025 Sep 22;13:e20046. doi: 10.7717/peerj.20046 (PMC12462686; doi:10.7717/peerj.20046)
Supplement: Supplemental Information 2 [file peerj-13-20046-s002.xlsx]

## Sheet: Sheet1
prognosis （1=favorable，0=unfavorable）	anterior （post-treatment）	ASR（post-treatment）
1	1.45	0.35
1	1.52	0.28
1	1.43	0.42
1	1.31	0.46
1	1.83	0.46
1	0.92	0.47
1	1.19	0.32
1	1.17	0.42
1	1.43	0.43
1	1.53	0.44
1	1.26	0.38
1	1.59	0.43
1	1.17	0.36
1	0.78	0.43
1	2.66	0.69
1	2.23	0.26
1	0.88	0.35
1	1.41	0.47
1	1.36	0.35
1	1.37	0.53
1	1.45	0.32
1	1.75	0.4
1	1.82	0.21
1	1.16	0.32
1	0.83	0.3
1	1.26	0.53
0	0.77	0.24
0	0.5	0.22
0	0.51	0.36
0	0.85	0.27
0	1.43	0.27
0	1.59	0.35
0	1.58	0.32
0	1.04	0.25
0	1.36	0.34
0	0.8	0.26
0	0.81	0.37
0	1.41	0.31
0	0.78	0.24
0	1.35	0.18
0	1.45	0.19
0	0.5	0.44
0	1.89	0.27
0	1.16	0.3
0	0.53	0.4
0	0.64	0.29
