# Supplementary material for: Prognostic utility of submental B/M-Mode ultrasonography for swallowing function assessment in post-stroke pharyngeal dysphagia: a preliminary study
Source: PeerJ. 2025 Sep 22;13:e20046. doi: 10.7717/peerj.20046 (PMC12462686; doi:10.7717/peerj.20046)
Supplement: Supplemental Information 3 [file peerj-13-20046-s003.xlsx]

## Sheet: 恢复好整理后数据 - T
gender（M=1，F=0）	AGE	location(Above the tentorium cerebelli=1,Under the tentorium cerebelli=0)	type （cerebral infarction=1，cerebral hemorrhage=0）	treatment period（d）	disease duration（d）	PAS（baseline）	PAS（ post-treatment）	FOIS（baseline）	FOIS（post-treatment）	VDS（baseline）	VDS（post-treatment）	tube feeding（baseline）	tube feeding（post-treatment）	maximum（baseline）	maximum（post-treatment）	anterior （baseline）	anterior （post-treatment）	superior（baseline）	superior（post-treatment）	total movement duration（baseline）	total movement duration（post-treatment）	ASR（baseline）	ASR（post-treatment）
1	47	0	1	70	62	6	5	1	6	42	24	1	0	1.49	1.76	0.54	1.45	1.07	1.09	3.252	1.415	0.27	0.35
1	66	0	1	39	29.2	6	4	4	6	44	20	0	0	1.5	1.74	1.37	1.52	0.87	1.14	1.334	1.108	0.24	0.28
1	79	0	1	33	29.2	6	4	2	5	46	22	1	1	1.21	1.87	1.03	1.43	0.75	1.26	1.001	0.884	0.31	0.42
1	54	1	0	20	62.05	8	2	1	5	48	12	1	0	1.29	1.47	1.02	1.31	0.63	0.97	2.057	0.782	0.37	0.46
0	50	1	1	14	62.05	6	4	4	6	44	21	0	0	1.51	2.19	1.34	1.83	0.92	1.56	1.21	1.134	0.32	0.46
1	48	0	1	42	29.2	6	5	4	7	44	18	1	0	0.87	1.1	0.76	0.92	0.53	0.84	1.51	1.382	0.45	0.47
1	49	0	1	28	25.55	8	3	1	7	49	10	1	0	1.17	1.39	0.77	1.19	0.73	0.84	1.372	0.837	0.27	0.32
1	48	0	1	60	120.45	8	2	1	7	47	8	1	0	0.86	1.56	0.46	1.17	0.75	1.14	2.38	0.956	0.32	0.42
0	80	0	1	41	14.6	5	3	4	7	39	14	0	0	1.39	1.68	1.15	1.43	0.96	0.84	1.1	0.9	0.36	0.43
0	35	0	1	23	14.6	8	2	1	7	48	9	1	0	1.41	2.18	0.83	1.53	1.12	1.53	1.77	0.86	0.17	0.44
1	79	0	1	51	62.05	6	2	2	7	38	13	0	0	1.31	1.44	1.1	1.26	0.64	0.75	0.94	1.144	0.38	0.38
1	77	0	1	30	10.95	6	4	1	5	42	21	1	0	1.54	1.76	1.32	1.59	1.17	1.48	1.161	1.301	0.31	0.43
1	50	0	0	111	365	5	3	3	5	37	16	0	0	1.2	2.32	0.81	1.17	0.93	2.2	0.916	0.884	0.14	0.36
1	87	0	1	23	29.2	6	6	2	5	38	34	0	0	1.37	1.02	1.28	0.78	0.85	0.62	1.032	0.708	0.39	0.43
1	67	1	1	18	365	5	3	4	6	39	15	0	0	2.34	3.07	2.01	2.66	1.35	1.41	2.235	1.808	0.47	0.69
1	49	1	1	34	18.25	6	2	3	6	45	11	0	0	1.66	2.86	0.92	2.23	1.45	1.76	1.56	0.923	0.2	0.26
1	63	0	1	18	62.05	8	7	1	5	46	41	1	1	1.64	1.56	0.8	0.88	1.53	1.32	1.285	1.4	0.33	0.35
1	53	0	1	26	29.2	6	2	4	7	47	8	0	0	1.39	1.62	1.26	1.41	1.23	1.32	0.988	1.089	0.39	0.47
0	75	0	1	60	91.25	6	5	4	6	46	37	0	0	1.04	1.84	0.75	1.36	0.62	1.47	0.939	0.89	0.33	0.35
1	75	1	1	185	120.45	4	2	4	7	36	13	0	0	1.3	1.59	1.1	1.37	0.89	1.26	0.84	0.796	0.31	0.53
1	53	0	1	28	10.95	8	2	3	7	46	8	1	0	1.24	1.62	0.91	1.45	0.68	1.02	1.2	0.944	0	0.32
1	64	1	1	189	182.5	6	3	4	6	42	14	1	0	1.71	2.08	0.83	1.75	1.33	1.28	0.806	0.92	0.38	0.4
1	42	0	1	16	29.2	6	3	3	5	40	20	1	0	1.3	2.07	1.04	1.82	0.67	0.75	1.166	0.869	0.17	0.21
0	92	0	1	57	730	7	5	3	6	46	37	0	0	1.76	1.38	1.54	1.16	1.06	0.7	0.864	1.071	0.09	0.32
1	47	1	0	20	29.2	8	6	2	5	48	41	1	0	1.18	1.5	0.54	0.83	1.12	1.27	0.868	1.387	0.29	0.3
1	62	1	1	23	14.6	6	2	1	7	14	8	1	0	1.2	1.59	0.8	1.26	0.96	1.17	2.633	1.086	0	0.53
