# Supplementary material for: Prognostic utility of submental B/M-Mode ultrasonography for swallowing function assessment in post-stroke pharyngeal dysphagia: a preliminary study
Source: PeerJ. 2025 Sep 22;13:e20046. doi: 10.7717/peerj.20046 (PMC12462686; doi:10.7717/peerj.20046)
Supplement: Supplemental Information 5 [file peerj-13-20046-s005.xlsx]

## Sheet: Sheet1
gender（M=1，F=0）	AGE	location(Above the tentorium cerebelli=1,Under the tentorium cerebelli=0)	type （cerebral infarction=1，cerebral hemorrhage=0）	treatment period（d）	disease duration（d）	PAS（baseline）	PAS（ post-treatment）	FOIS（baseline）	FOIS（post-treatment）	VDS（baseline）	VDS（post-treatment）	tube feeding（baseline）	tube feeding（post-treatment）	maximum（baseline）	maximum（post-treatment）	anterior （baseline）	anterior （post-treatment）	superior（baseline）	superior（post-treatment）	total movement duration（baseline）	total movement duration（post-treatment）	ASR（baseline）	ASR（post-treatment）
0	55	0	0	58	91.25	6	6	2	3	42	41	1	1	1.53	1.19	0.88	0.77	1.22	0.93	1.136	1.758	0.25	0.24
1	77	0	1	43	29.2	8	8	1	1	51	49	1	0	0.78	0.74	0.51	0.5	0.42	0.47	1.009	1.115	0.19	0.22
0	52	1	0	37	1460	6	6	3	4	43	41	0	0	0.77	0.7	0.52	0.51	0.46	0.45	0.64	0.61	0.21	0.36
1	80	0	1	56	58.4	8	8	1	2	49	46	1	0	1	1.38	0.72	0.85	0.57	1.14	3.2	3.8	0.19	0.27
1	86	1	0	78	43.8	5	6	3	4	40	42	0	0	1.37	1.59	1.28	1.43	1.13	1.22	2.001	1.768	0.32	0.27
1	79	0	1	67	1095	8	8	1	2	45	44	1	1	1.5	1.87	1.21	1.59	0.63	0.7	2.076	1.894	0.37	0.35
0	67	0	0	30	91.25	6	6	4	4	42	40	1	0	1.53	1.93	1.34	1.58	0.72	1.14	1.2	1	0.46	0.32
0	58	0	1	50	91.25	6	6	1	2	41	39	1	0	1.41	2.02	0.73	1.04	1.34	1.66	3.06	1.66	0.27	0.25
1	83	0	1	61	365	6	6	4	5	39	36	0	0	1.39	1.51	1.12	1.36	0.63	0.76	3.271	2.996	0.39	0.34
1	78	1	1	60	244.55	8	8	4	4	48	45	1	1	1.26	1.24	0.82	0.8	0.68	0.71	1.267	1.77	0.24	0.26
1	61	1	0	27	1825	6	5	1	2	42	38	0	0	0.9	1.18	0.73	0.81	0.64	0.75	1.009	0.88	0.48	0.37
1	60	0	1	45	91.25	8	6	1	4	47	43	1	0	1.41	1.97	1.06	1.41	1.06	1.3	1.056	1.189	0.42	0.31
1	60	0	1	98	62.05	7	7	1	2	45	44	1	1	1.37	1.9	0.86	0.78	1.23	1.74	1.23	2.075	0.35	0.24
1	55	1	1	65	62.05	6	5	1	2	43	40	1	0	1.51	1.83	0.85	1.35	1.32	1.31	1.826	4.01	0.27	0.18
1	67	0	1	66	14.6	6	6	2	3	44	42	1	1	1.67	1.6	1.48	1.45	1.36	1.34	0.842	0.88	0.23	0.19
1	69	0	1	81	18.25	8	8	2	2	53	47	1	1	1.37	1.15	0.46	0.5	1.12	1.14	3.745	6.601	0.46	0.44
1	62	0	1	32	29.2	7	5	2	3	43	38	1	0	1.83	2.32	1.55	1.89	1.47	1.38	0.713	0.733	0.23	0.27
1	64	0	1	39	18.25	7	6	1	3	44	39	1	0	0.87	1.38	0.63	1.16	0.62	1.09	1.11	1.032	0.23	0.3
0	60	0	1	60	91.25	8	7	1	3	49	48	1	1	1.27	1.85	0.65	0.53	1.17	1.79	2.133	2.089	0.38	0.4
1	65	0	1	114	43.8	8	7	1	3	55	50	1	1	1.73	1.61	0.82	0.64	1.41	1.48	3.865	7.399	0.34	0.29
